# Supplementary material
Source: ML conference proceedings conference paper supplement (https://openreview.net/forum?id=BNRylXgEgw)

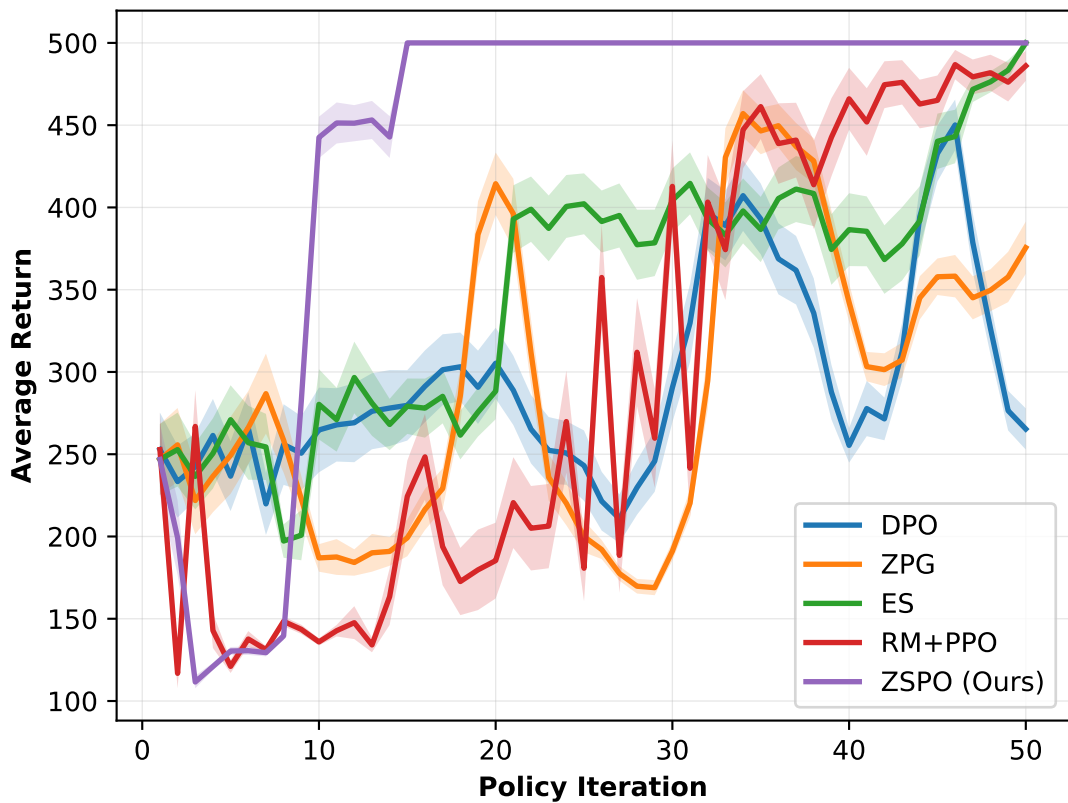

Supplement: supplementary_material [file CartPole.pdf › Code_for_Submission/CartPole/Data_for_Plot/Linear/CartPole.pdf]

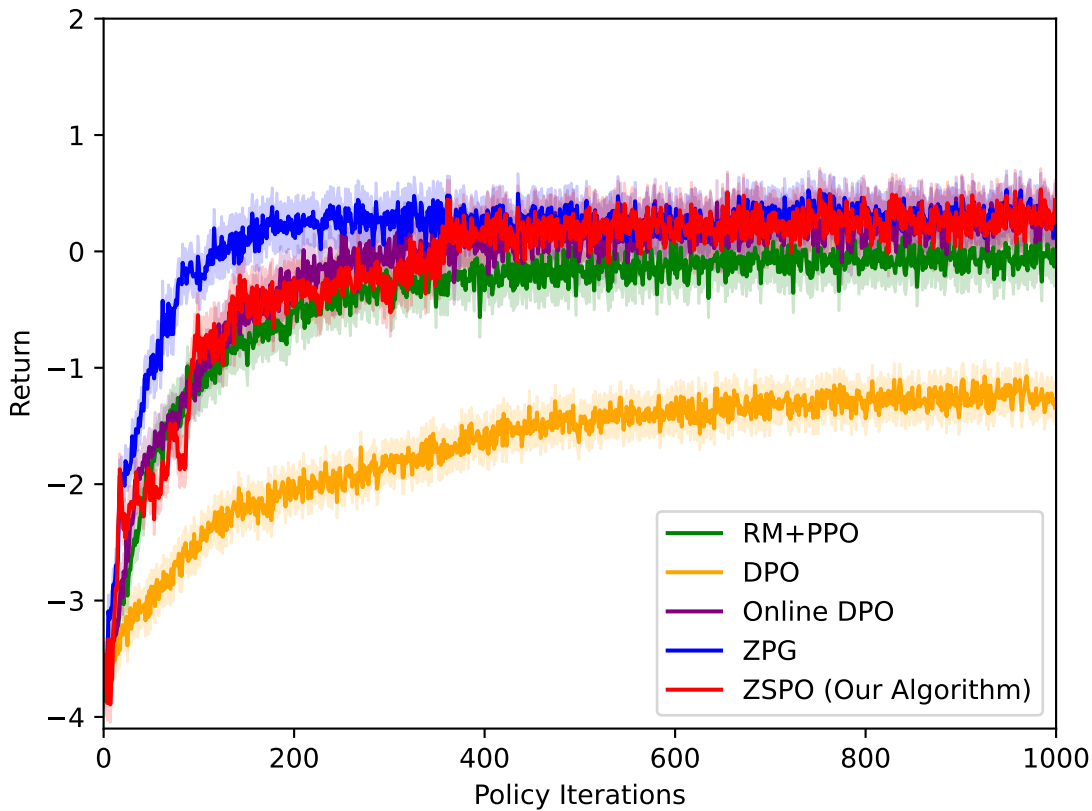

Supplement: supplementary_material [file BradleyTerry.pdf › Code_for_Submission/GridWorld/figure/BradleyTerry.pdf]

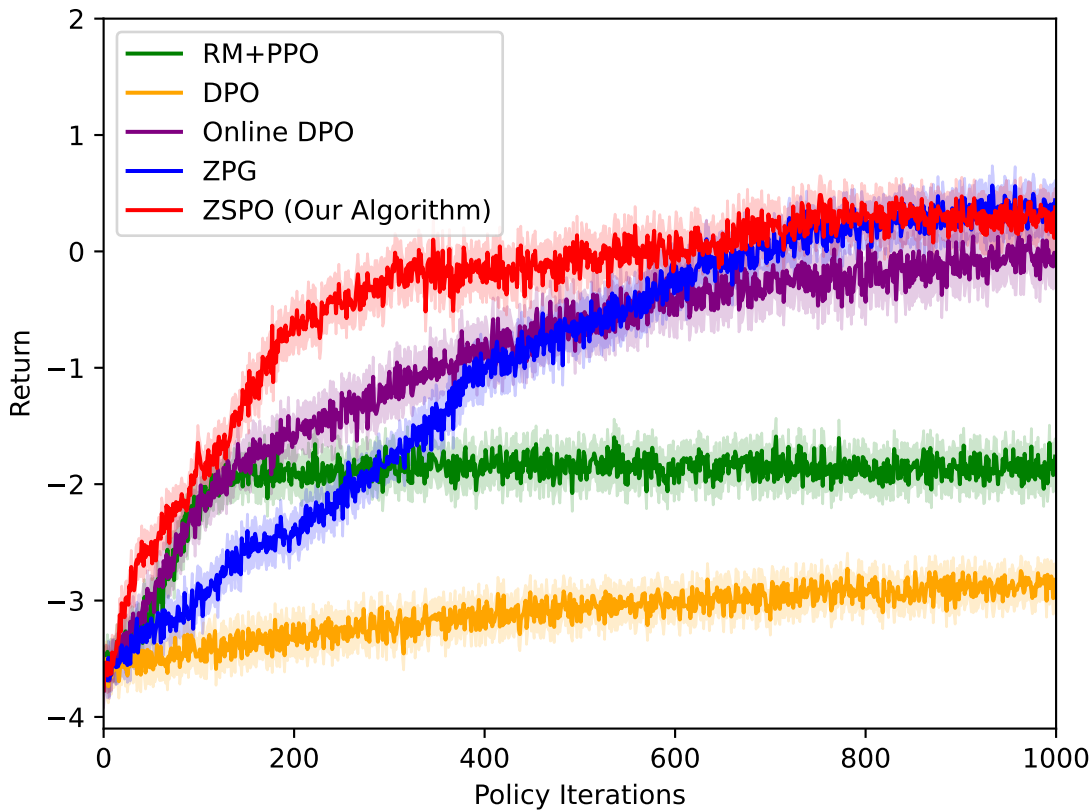

Supplement: supplementary_material [file LinearMismatch.pdf › Code_for_Submission/GridWorld/figure/LinearMismatch.pdf]

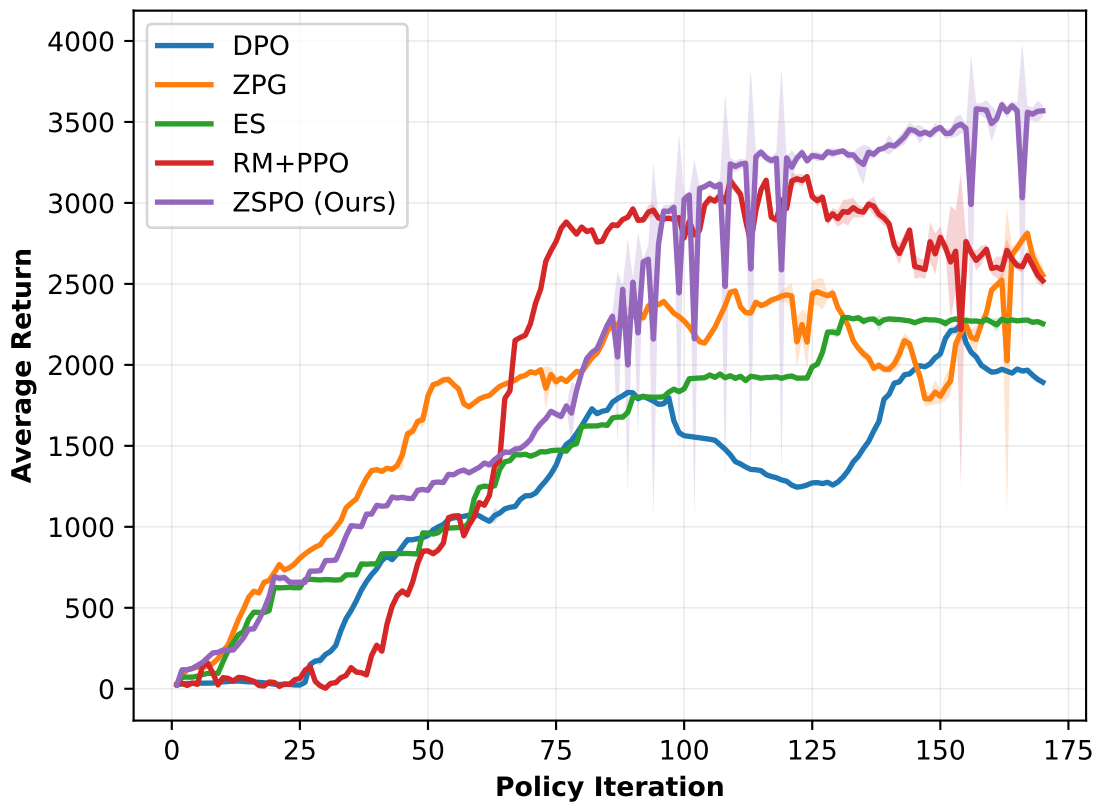

Supplement: supplementary_material [file HalfCheetah.pdf › Code_for_Submission/HalfCheetah/Data_for_Plot/Linear/HalfCheetah.pdf]

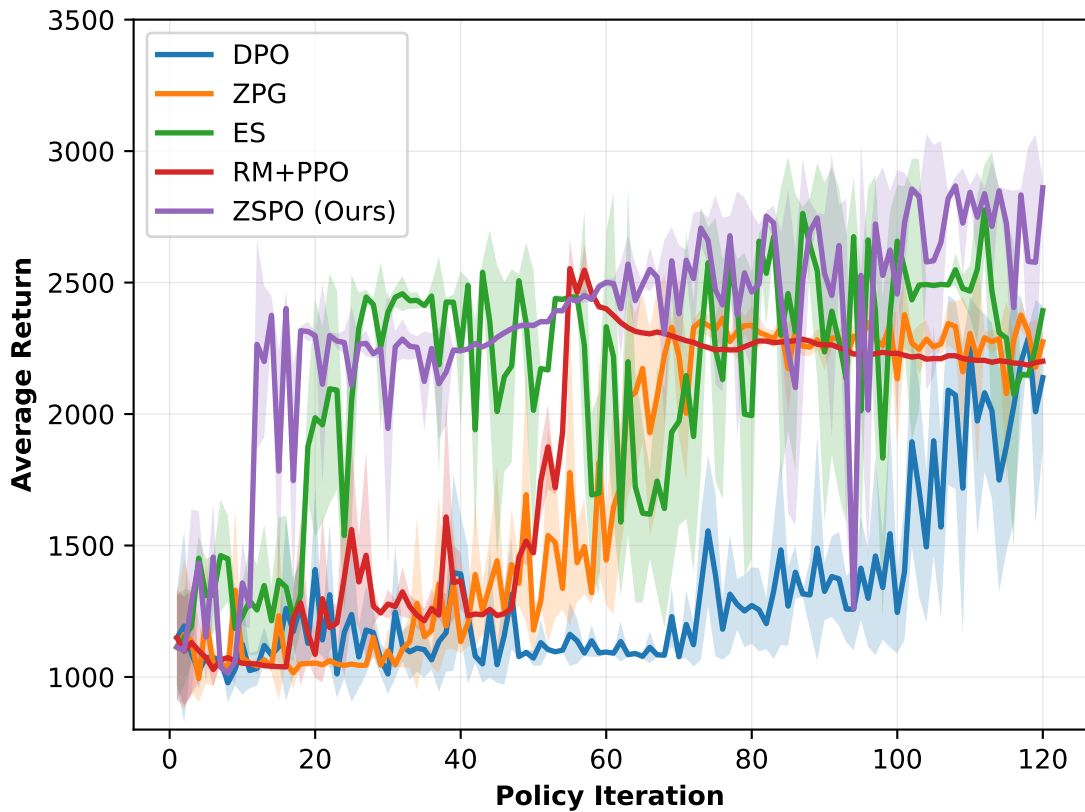

Supplement: supplementary_material [file Hopper.pdf › Code_for_Submission/Hopper/Data_for_Plot/Linear/Hopper.pdf]
